# Supplementary material for: Molecular motion in the nanospace of MOFs upon gas adsorption investigated byin situRaman spectroscopy
Source: Royal Society of Chemistry journal article supplement (doi:10.1039/d0fd00002g), 2020-01-30
Supplement: d0fd00002g1.pdf [file d0fd00002g1.pdf]

## Supplementary information

### **Molecular motion in the nanospace of MOFs upon gas adsorption investigated by in situ Raman spectroscopy**

Shinpei Kusaka,<sup>a</sup> Yasuaki Nakajima,<sup>a</sup> Akihiro Hori,<sup>a</sup> Akira Yonezu,<sup>a</sup> Kenta Kikushima,<sup>a</sup> Wataru Kosaka,<sup>b</sup>  
Yunsheng Ma<sup>c</sup> and Ryotaro Matsuda<sup>\*ad</sup>

- a. Department of Chemistry and Biotechnology, School of Engineering, Nagoya University, Chikusa-ku, Nagoya 464-8603, Japan.
- b. Institute for Materials Research, Tohoku University, 2-1-1 Katahira, Aoba-ku, Sendai, 980-8577, Japan.
- c. School of Chemistry and Materials Engineering, Jiangsu Key Laboratory of Advanced Functional Materials, Changshu Institute of Technology, Changshu, Jiangsu 215500, PR China.
- d. Institute for Advanced Research, Nagoya University, Chikusa-ku, Nagoya 464-8603, Japan.

\*To whom correspondence should be addressed: ryotaro.matsuda@chembio.nagoya-u.ac.jp

## **General Procedures and Materials**

### **General Procedures**

The powder X-ray diffraction patterns (PXRD) measurements were carried out on a Rigaku MiniFlex600 using a Cu K $\alpha$  radiation ( $\lambda = 1.5406 \text{ \AA}$ ) with a scan rate of 10 degree/min at room temperature.

Simulated powder patterns from single-crystal X-ray diffraction data were generated using Mercury 1.4.1 software.

N<sub>2</sub> adsorption measurements at 77 K were performed with BELSORP-mini (MicrotracBEL corp.). A sample was heated at 120 °C under vacuum for 6 h prior to the measurements.

### **Materials**

Cu(HCOO)<sub>2</sub>·4H<sub>2</sub>O and toluene were purchased from FUJIFILM Wako Pure Chemical Corp., 1,4-benzenedicarboxylic acid (H<sub>2</sub>bdc) and 1,4-diazabicyclo[2.2.2]octane (dabco) were from Tokyo Chemical Industry, methanol (MeOH) was from Nacalai Tesque and formic acid was from Kanto Chemical Co., Inc..

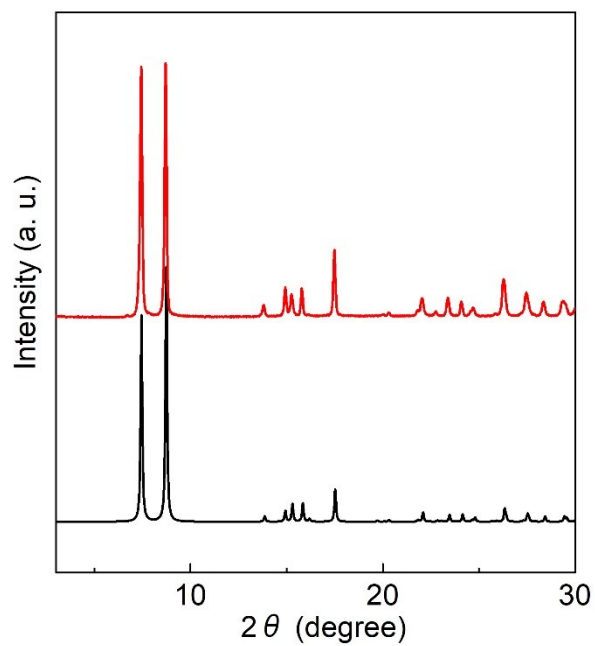

**Fig. S1.** PXRD patterns of MIL-140A (black: simulated, red: experimental)

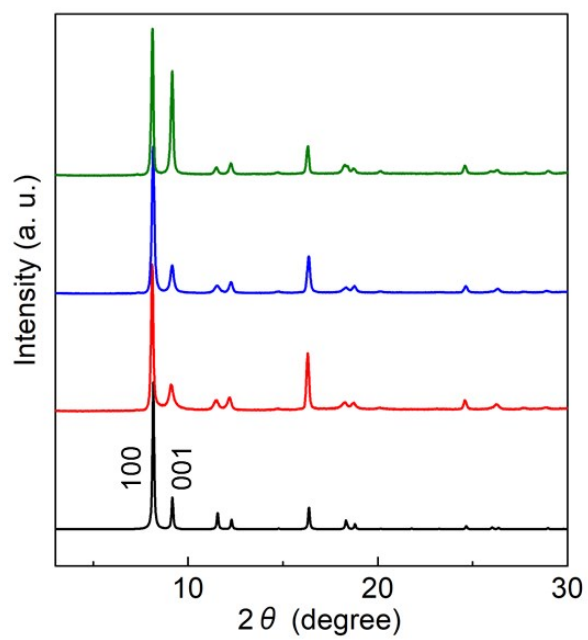

**Fig. S2.** PXRD patterns of Cu-JAST-1 (black: simulated, red: experimental), Cu-JAST-1D (blue: experimental) and Cu-JAST-5 (green: experimental)

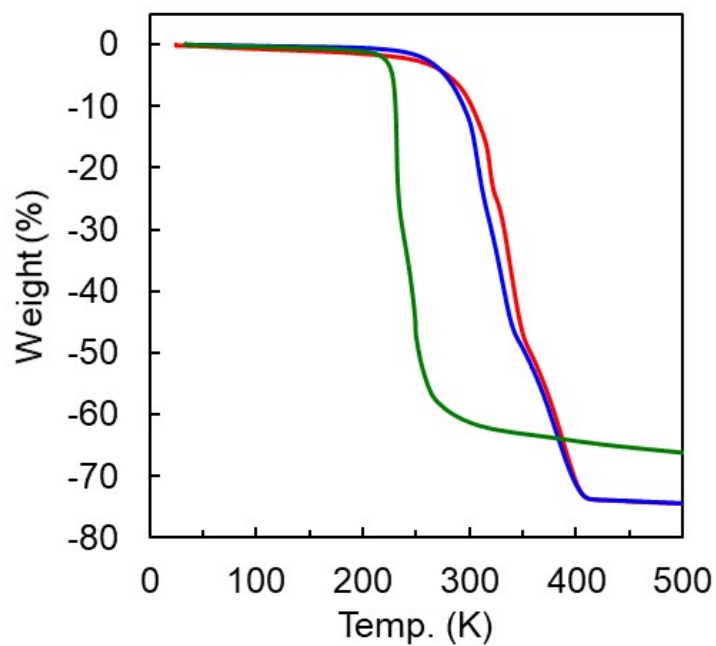

**Fig. S3.** Thermogravimetric analysis curves for Cu-JAST-1 (red), Cu-JAST-1D (blue) and Cu-JAST-5 (green)

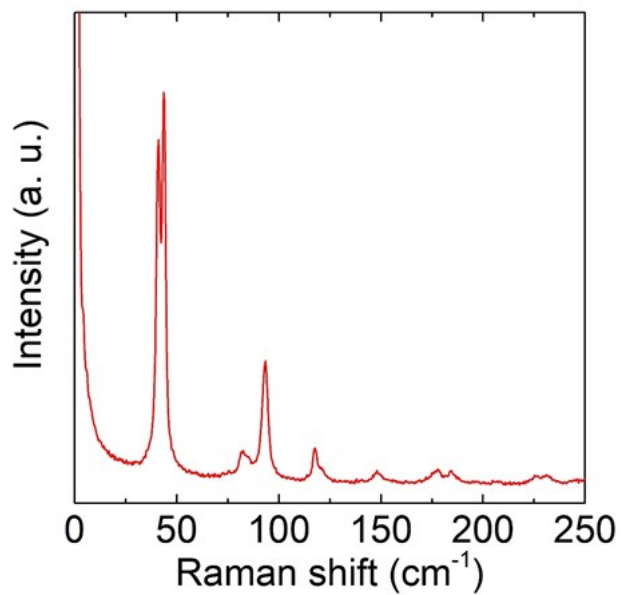

**Fig. S4.** Raman spectrum of MIL-140A.

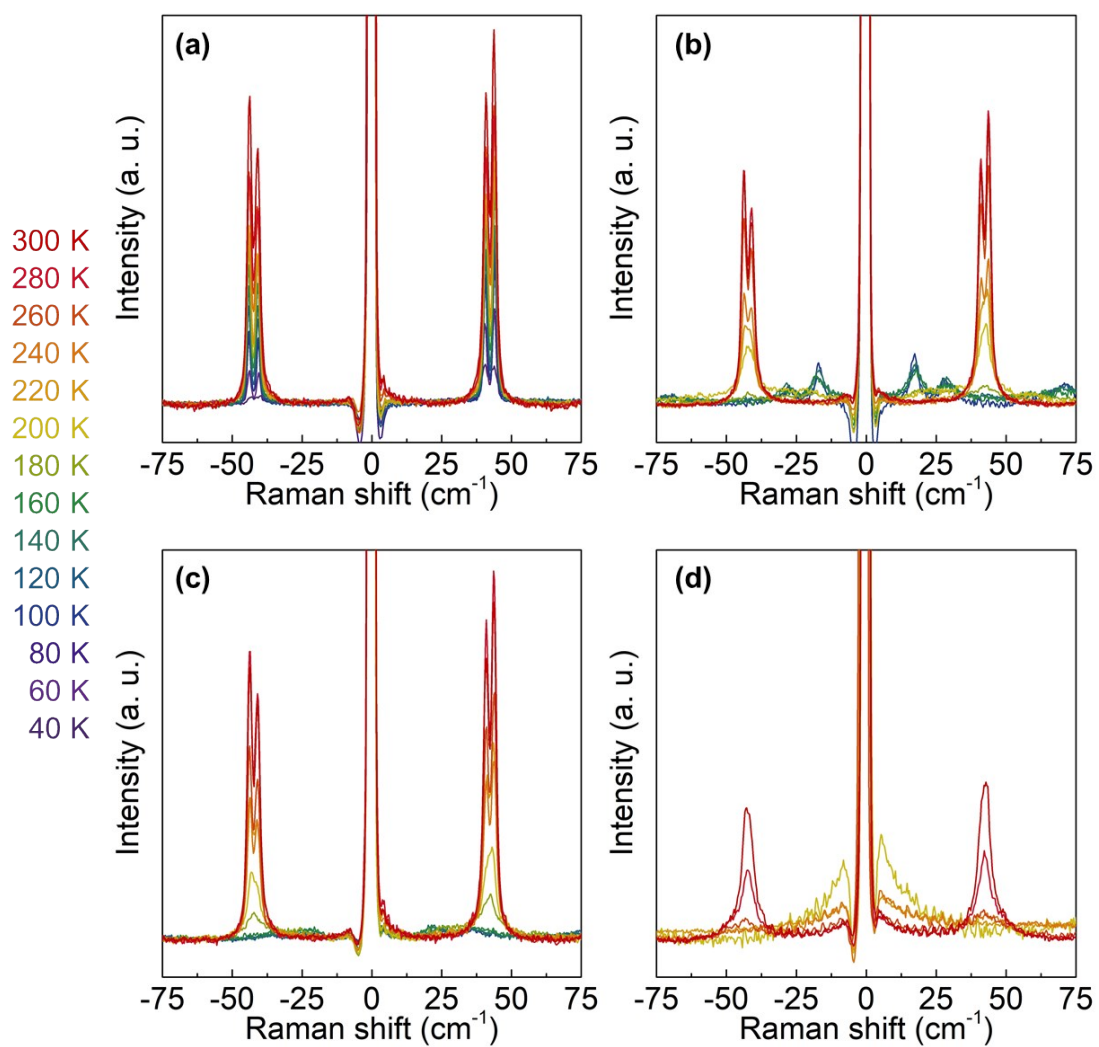

**Figure S5.** Temperature dependent Raman spectra of MIL-140 A of low frequency region under (a) He (b) Ar (c)  $\text{N}_2$  (d)  $\text{CO}_2$  at 100 K. The peak intensity was normalized using the peak at  $800 \text{ cm}^{-1}$  as the standard.

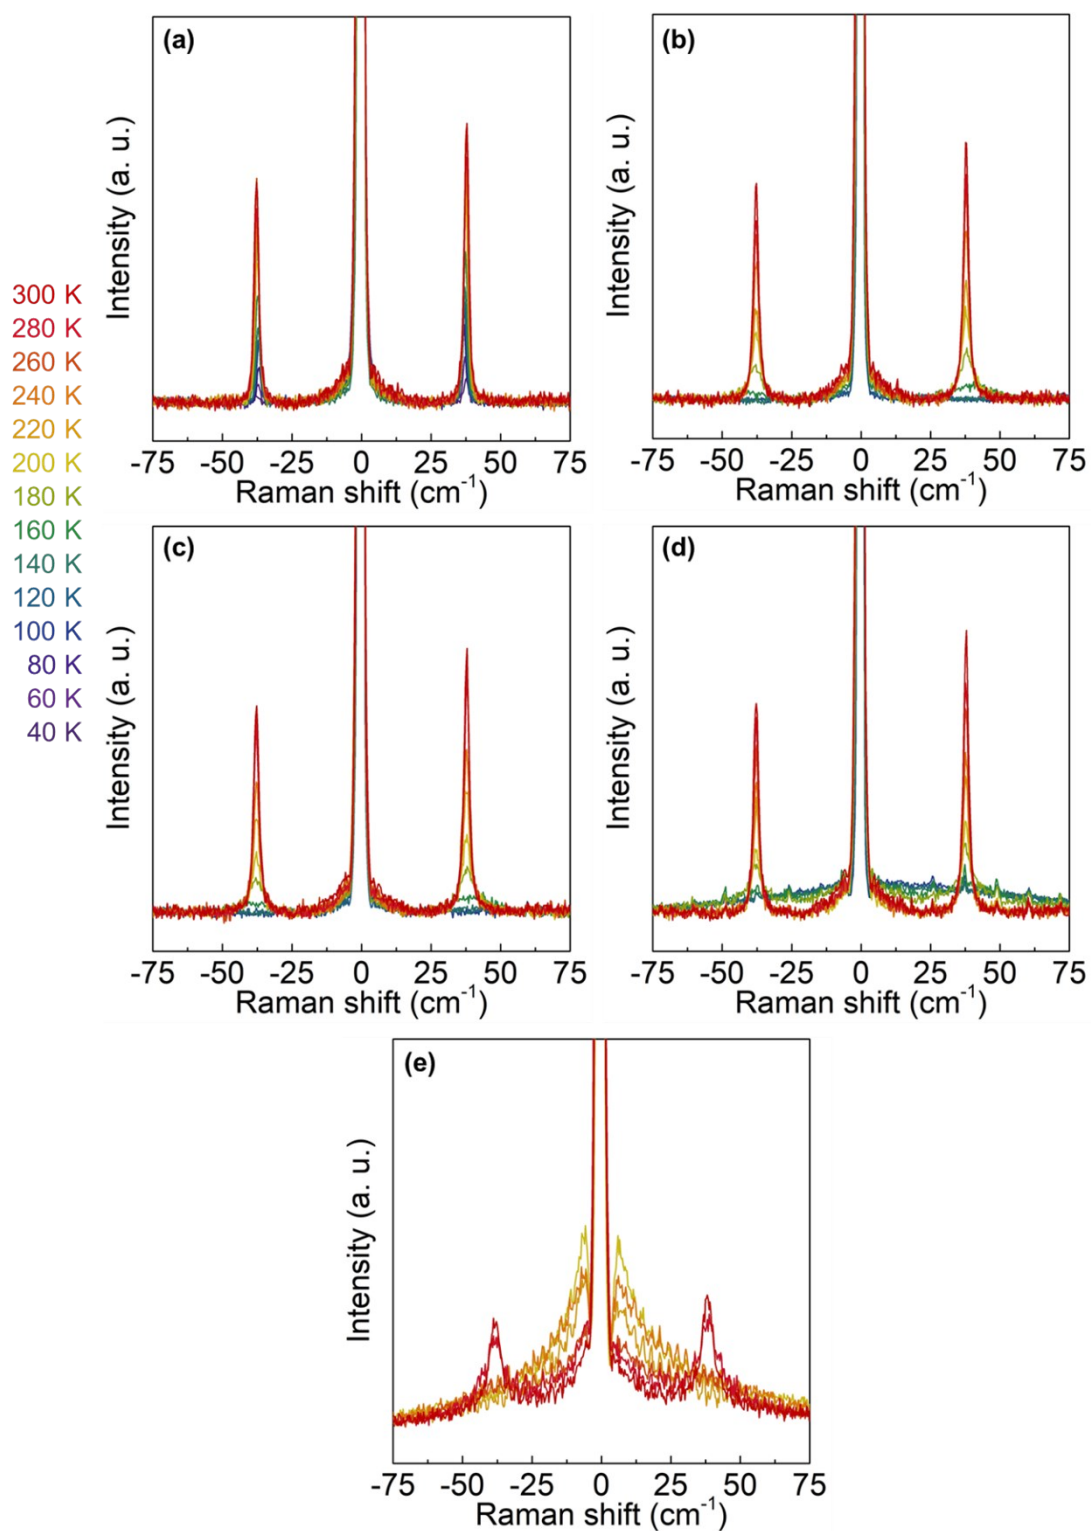

**Figure S6.** Temperature dependent Raman spectra of Cu-JAST-1 of low frequency region under (a) He (b) Ar (c) N<sub>2</sub> (d) O<sub>2</sub> (e) CO<sub>2</sub> at 100 KPa. The peak intensity was normalized using the peak at 450 cm<sup>-1</sup> as the standard.

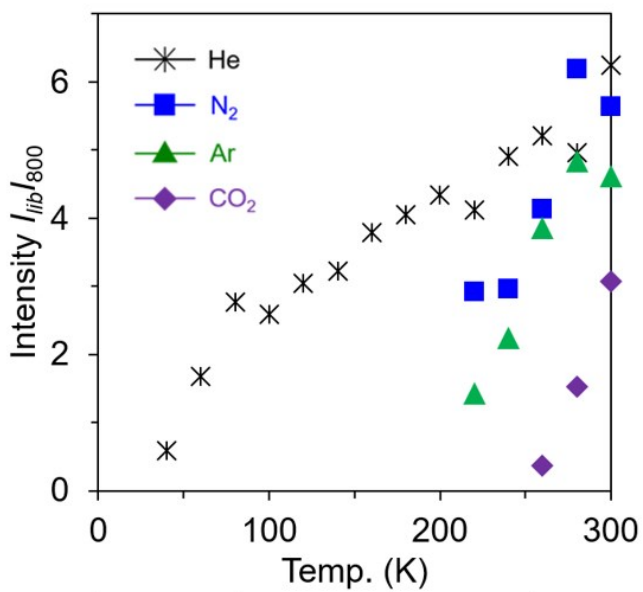

Fig. S7. Temperature dependent Raman peak intensity for the libration mode in MIL-140A

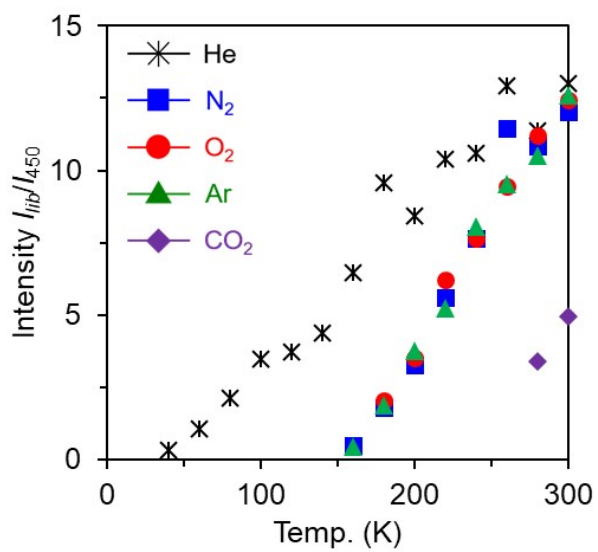

Fig. S8. Temperature dependent Raman peak intensity for the libration mode in Cu-JAST-1

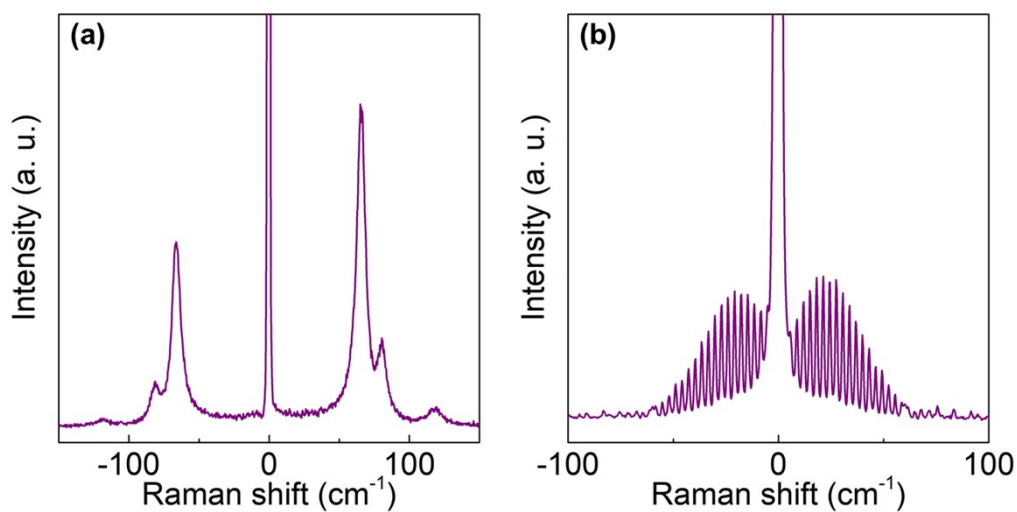

Fig. S9. Raman spectra for CO<sub>2</sub> in (a) solid and (b) gas phases.

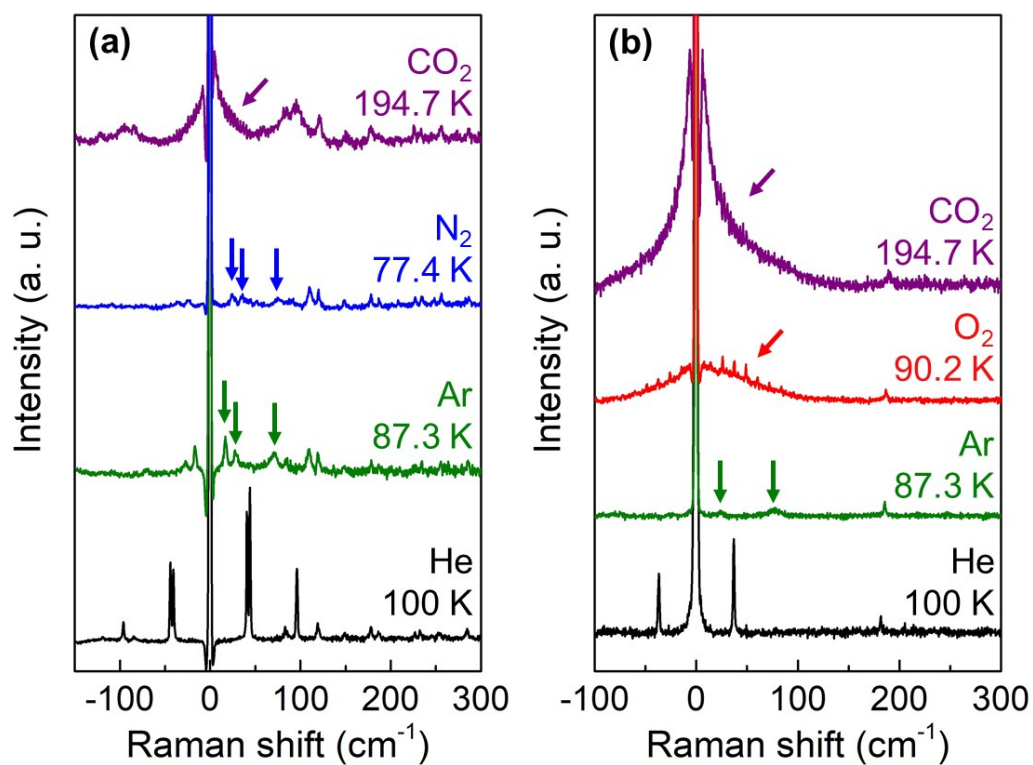

Fig. S10. Raman spectra of (a) MIL-140A and (b) Cu-JAST-1 under each gas at 100 kPa



**Table S1.** Experimental values of rotational constants for each gas.

|                 | Reported             | This work |
|-----------------|----------------------|-----------|
| N <sub>2</sub>  | 1.998 <sup>S1</sup>  | 1.987     |
| O <sub>2</sub>  | 1.438 <sup>S2</sup>  | 1.436     |
| CO <sub>2</sub> | 0.3915 <sup>S3</sup> | 0.3896    |

## References

S1. P. Stoicheff, *Can. J. Phys.*, 1954, **32**, 630.

S2. G. Rouille, G. Millot, R. Saint-Loup and H. Berger, *J. Mol. Spectrosc.*, 1992, **154**, 372.

S3. G. Herzberg and L. Herzberg, *J. Opt. Soc. Am.*, 1953, **43**, 1037.
